# Supplementary material
Source: MDPI journal article supplement (https://www.mdpi.com/2079-6412/12/4/528)
Supplement: s1 [file s1]

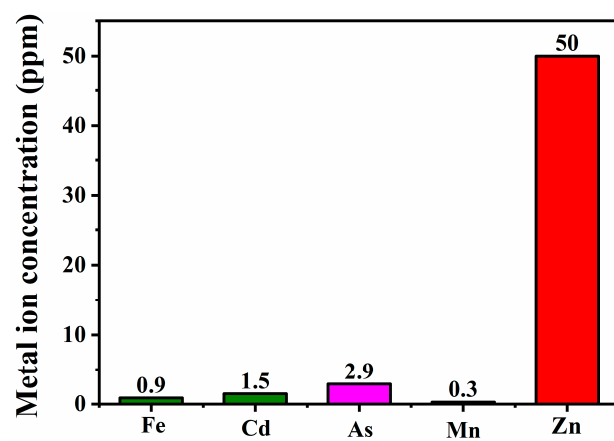

**Figure S1.** The main metal ion concentration of NS (0.1 g/L) measured by ICP-MS after digesting NS with nitric acid.

**Table S1.** Weight ratio of main metal component in NS.

| Metal Element    | Zn | Fe  | Cd  | As  | Mn  |
|------------------|----|-----|-----|-----|-----|
| Weight ratio (%) | 90 | 1.6 | 2.7 | 5.2 | 0.5 |

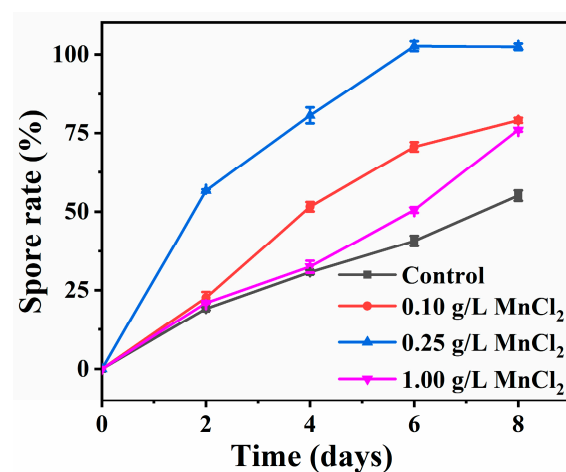

**Figure S2.** Sporulation efficiency of *B. subtilis* with different concentrations of  $\text{Mn}^{2+}$  after incubation at 37 °C for 8 days.

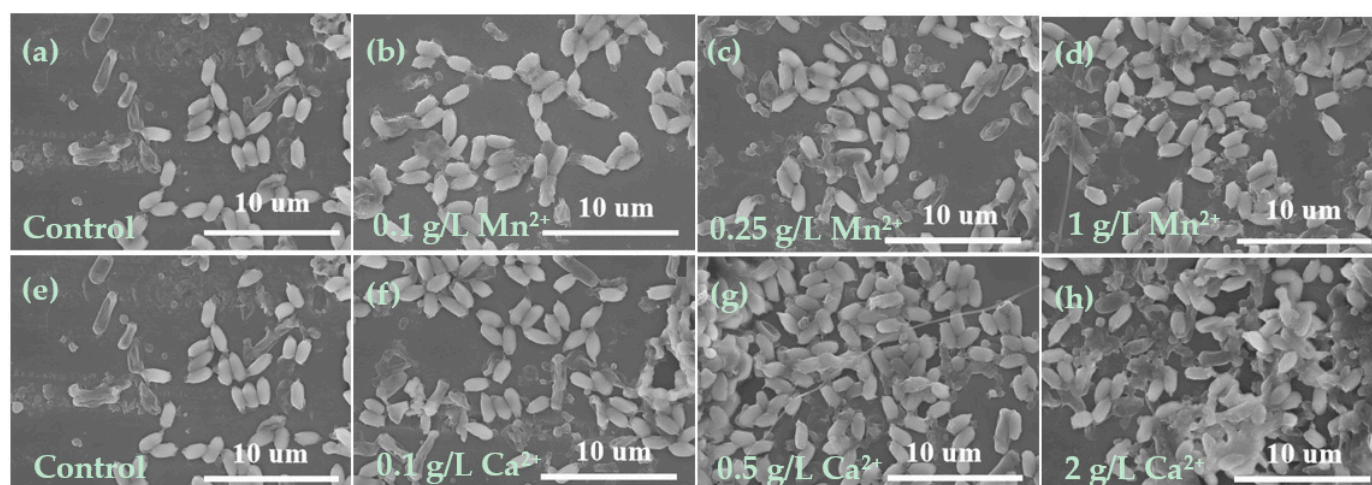

**Figure S3.** (a–d) SEM images of *B. subtilis* cultured in NB medium supplemented with different concentrations of  $\text{Ca}^{2+}$  for 8 days; (e–h) SEM images of *B. subtilis* cultured in NB medium supplemented with different concentrations of  $\text{Mn}^{2+}$  for 8 days. In both cases, the cell density of produced spores was increased with the increase of metal ions (Magnification: 5000×).
